# Supplementary material
Source: PubMed Central journal article supplement (PMC4945761)
Supplement: BPH-173-2352-s001.pdf [file BPH-173-2352-s001.pdf]

## **Supplementary material**

### **Hepatic NAD<sup>+</sup> deficiency as a therapeutic target for NAFLD in aging**

Can-Can Zhou<sup>1\*</sup>, Xi Yang<sup>1\*</sup>, Xia Hua,<sup>1\*</sup> Jian Liu<sup>2</sup>, Mao-Bing Fan<sup>1</sup>, Guo-Qiang Li<sup>1</sup>, Jie Song<sup>1</sup>, Tian-Ying Xu,<sup>1</sup> Zhi-Yong Li<sup>1</sup>, Yun-Feng Guan,<sup>1</sup> Pei Wang,<sup>1#</sup> Chao-Yu Miao<sup>1#</sup>

#### **Authors' Affiliations:**

<sup>1</sup>Department of Pharmacology, Second Military Medical University, Shanghai, China

<sup>2</sup>Department of Hepatic Surgery, Eastern Hepatobiliary Surgery Hospital, Second Military Medical University, Shanghai, China

**\*These authors contribute equally to this work**

**#Correspondence should be addressed to:**

Chao-Yu Miao, MD, PhD, or Pei Wang, MD, PhD

Department of Pharmacology, Second Military Medical University, Shanghai, China

Tel: 86-21-81871271; Fax: 86-21-65493951

Email: [cymiao@smmu.edu.cn](mailto:cymiao@smmu.edu.cn) or [pwang@smmu.edu.cn](mailto:pwang@smmu.edu.cn)

**Supplementary Figure 1**

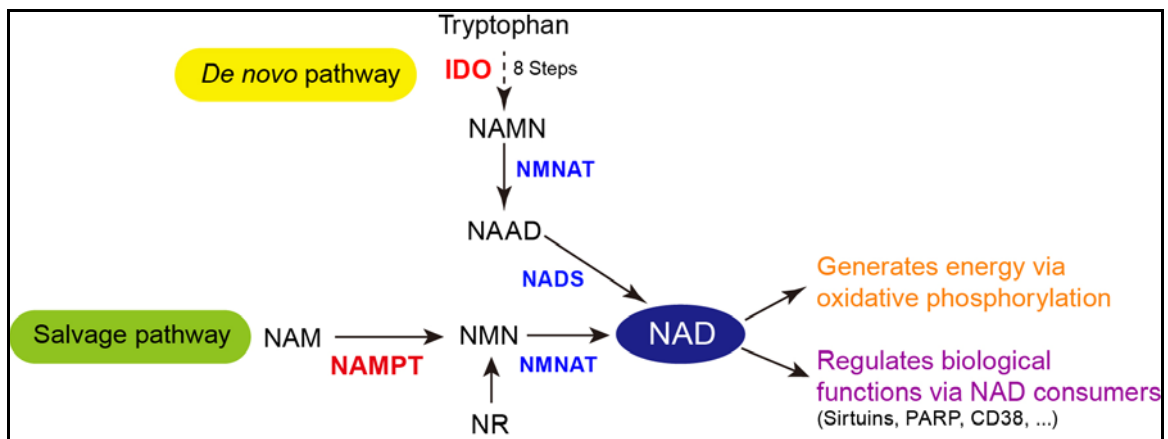

Illustration of NAD<sup>+</sup> *de novo* and salvage biosynthesis pathway. NAMPT is the step-limiting enzyme for salvage biosynthesis, whereas NADS and NMNAT are two important enzyme for NAD<sup>+</sup> *de novo* biosynthesis.

## Supplementary Figure 2

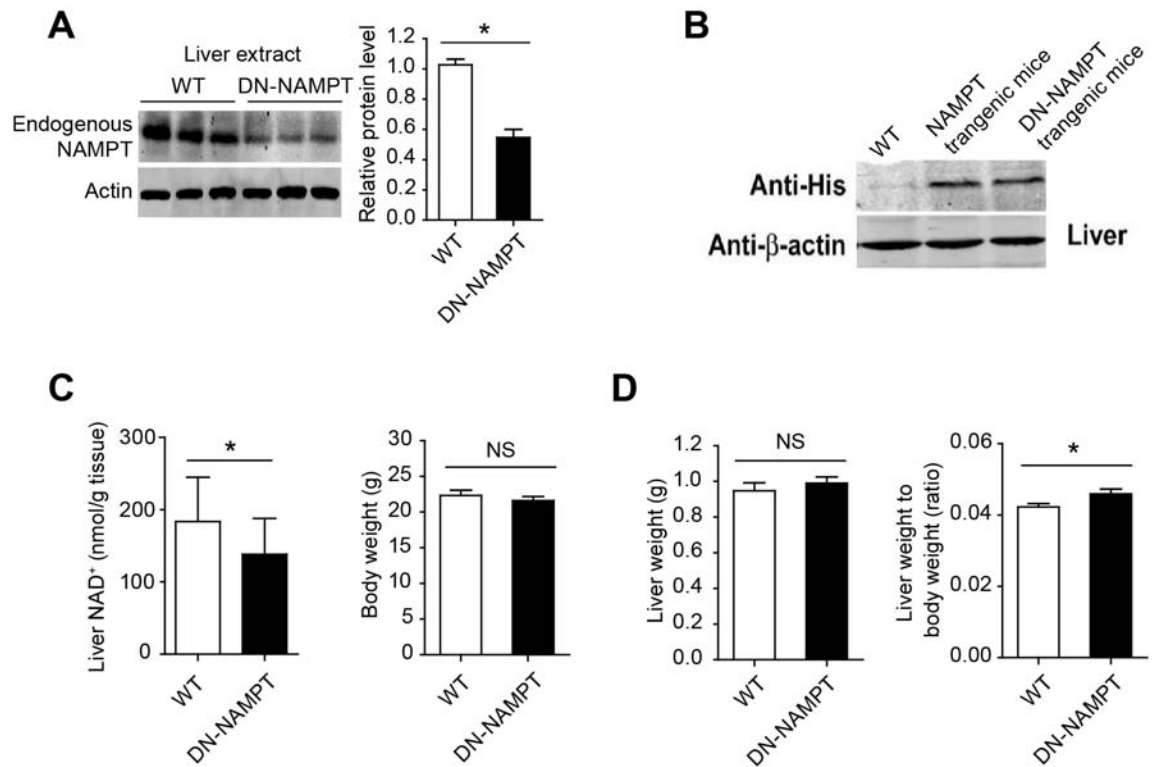

**Decline of NAD<sup>+</sup> pool in DN-NAMPT mice.** (A) Endogenous NAMPT protein expression in WT and DN-NAMPT mice. \**P* < 0.05 by Student's *t*-test. *n* = 8 for each group. (B) Detecting his-tag in WT, NAMPT and DN-NAMPT transgenic mice. (C) Liver NAD<sup>+</sup> levels in liver tissues of WT and DN-NAMPT mice. \**P* < 0.05 by Student's *t*-test. *n* = 8 for each group. (D) Body weight, liver weight and liver/body weight ratio in WT and DN-NAMPT mice. \**P* < 0.05 by Student's *t*-test. *n* = 8 for each group.

### Supplementary Figure 3

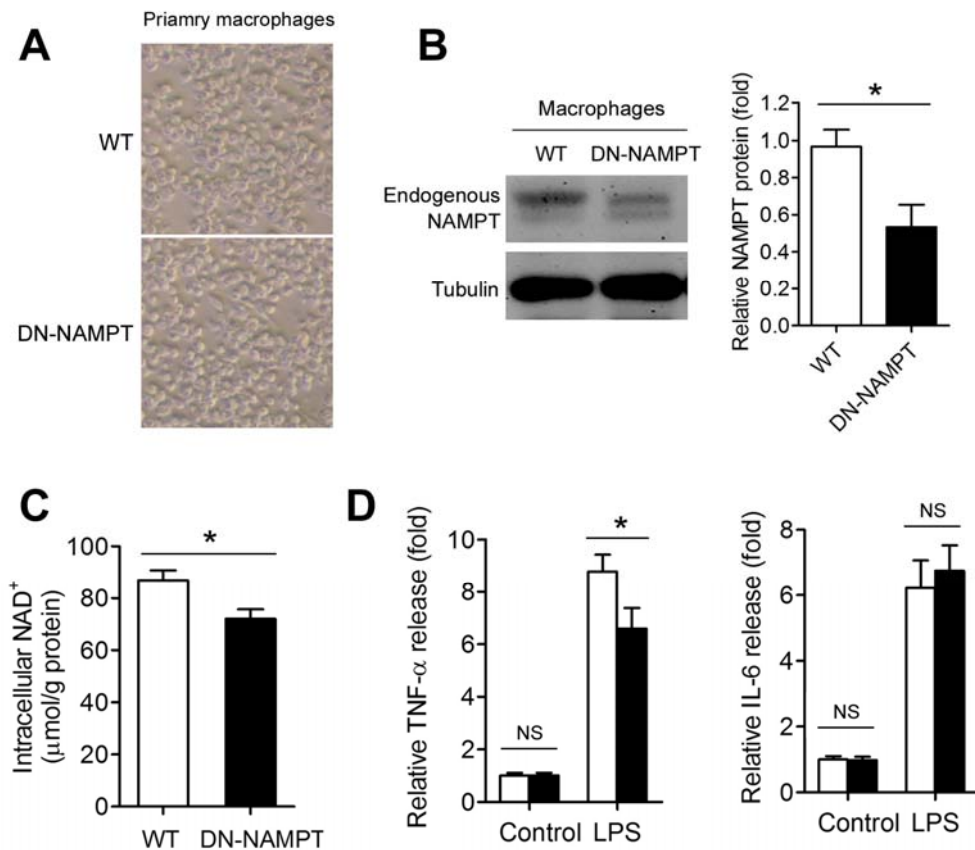

**Macrophages isolated from WT and DN-NAMPT mice.** (A) Representative images of isolated and cultured primary macrophages from WT and DN-NAMPT mice. (B) Endogenous NAMPT detection using a specific antibody against full-length NAMPT.  $*P < 0.05$  by Student's t-test.  $n = 6$  for each group. (C) Intracellular NAD<sup>+</sup> levels in macrophages isolated from WT and DN-NAMPT mice.  $*P < 0.05$  by Student's t-test.  $n = 6$  for each group. (D) Determination of TNF- $\alpha$  and IL-6 release from macrophages isolated from WT and DN-NAMPT mice.  $*P < 0.05$  by Student's t-test.  $n = 6$  for each group. NS, no significance.

## Supplementary Figure 4

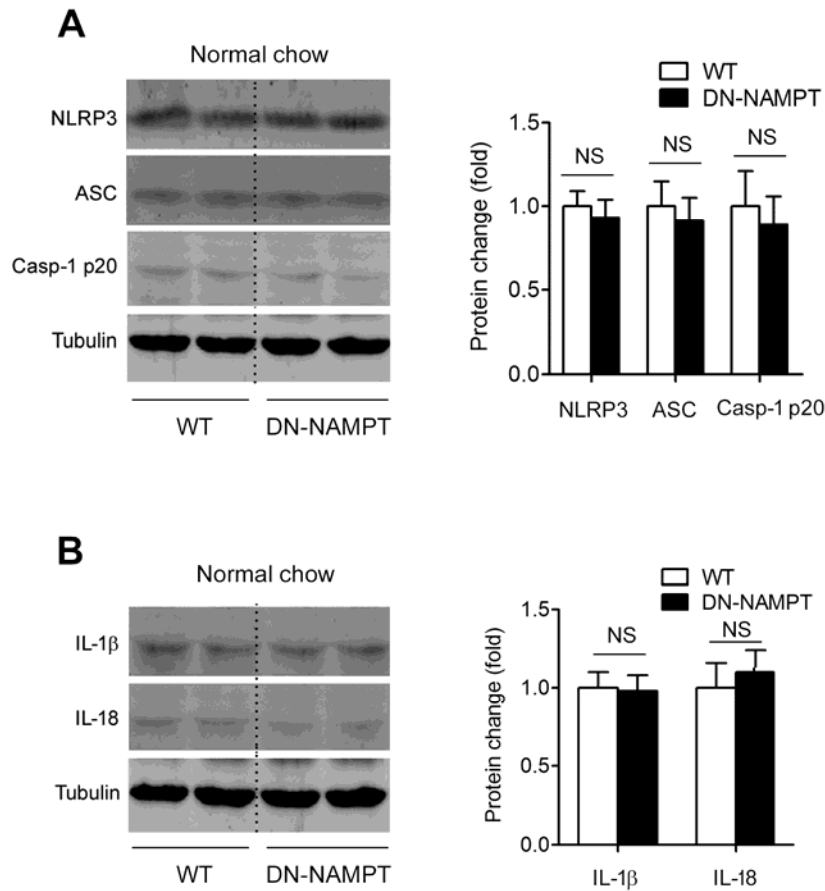

**NLRP3 inflammasome pathway in livers of WT and DN-NAMPT mice under normal chow.** (A) Representative images of isolated and cultured primary macrophages from WT and DN-NAMPT mice. (B) Endogenous NAMPT detection using a specific antibody against full-length NAMPT. \* $P < 0.05$  by Student's t-test.  $n = 6$  for each group. (C) Intracellular  $\text{NAD}^+$  levels in macrophages isolated from WT and DN-NAMPT mice. \* $P < 0.05$  by Student's t-test.  $n = 6$  for each group. (D) Determination of  $\text{TNF-}\alpha$  and IL-6 release from macrophages isolated from WT and DN-NAMPT mice. \* $P < 0.05$  by Student's t-test.  $n = 6$  for each group. NS, no significance.

**Supplementary Figure 5**

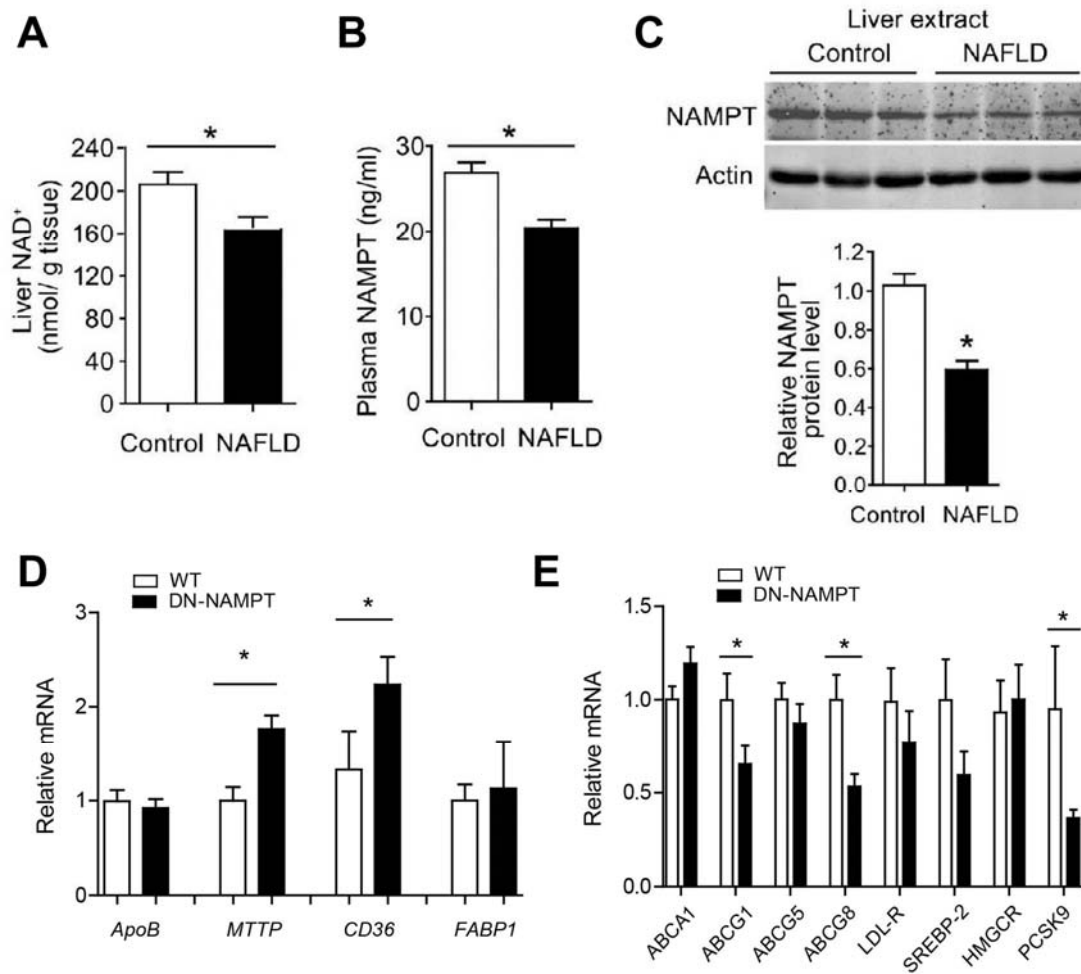

**Decline of NAD<sup>+</sup> pool in HFD-induced NAFLD mice and DN-NAMPT mice and lipid profiles in HFD-fed WT and DN-NAMPT mice.** (A) Liver NAD<sup>+</sup> levels in liver tissues of HFD-induced NAFLD mice. The mice were fed with HFD for 16 weeks. \* $P < 0.05$  by Student's t-test.  $n = 8$  for each group. (B-C) Decline of NAMPT protein in plasma (B) and liver (C) of NAFLD mice. \* $P < 0.05$  by Student's t-test.  $n = 8$  for each group. (D-E) Expression of triglyceride and cholesterol efflux genes in HFD-fed WT and DN-NAMPT mice. \* $P < 0.05$  by Student's t-test.  $n = 8$  for each group.

## Supplementary Figure 6

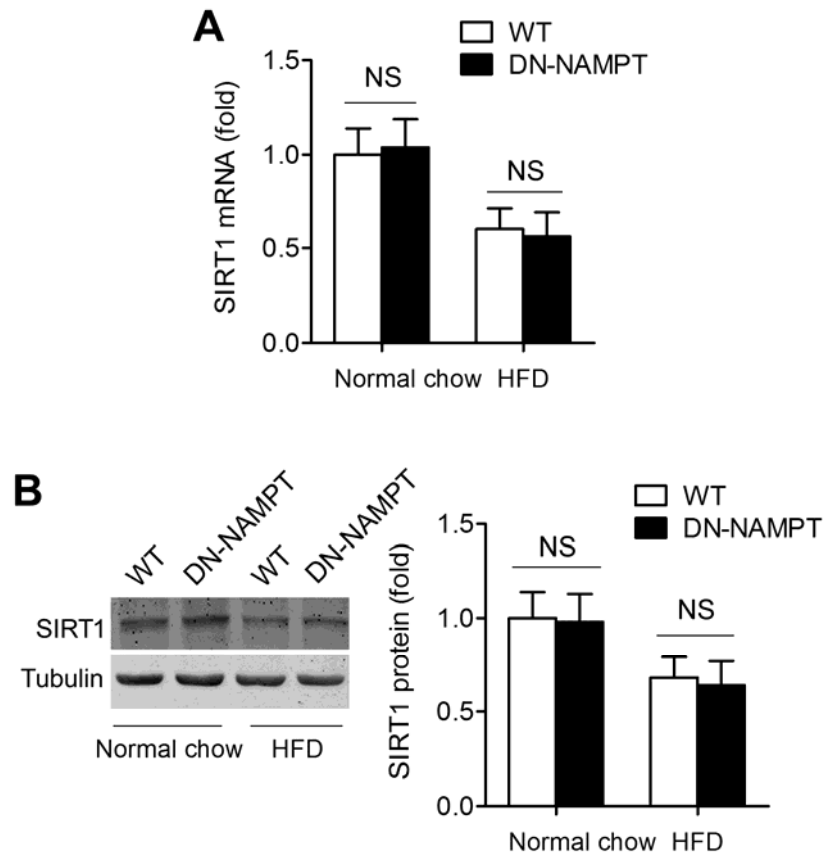

**SIRT1 mRNA and protein levels in WT and DN-NAMPT mice under normal chow or HFD.** (A) SIRT1 mRNA level in livers of WT and DN-NAMPT mice. NS, no significance. n = 6 for each group. (B) SIRT1 protein level in livers of WT and DN-NAMPT mice. NS, no significance. n = 6 for each group.

## Supplementary Figure 7

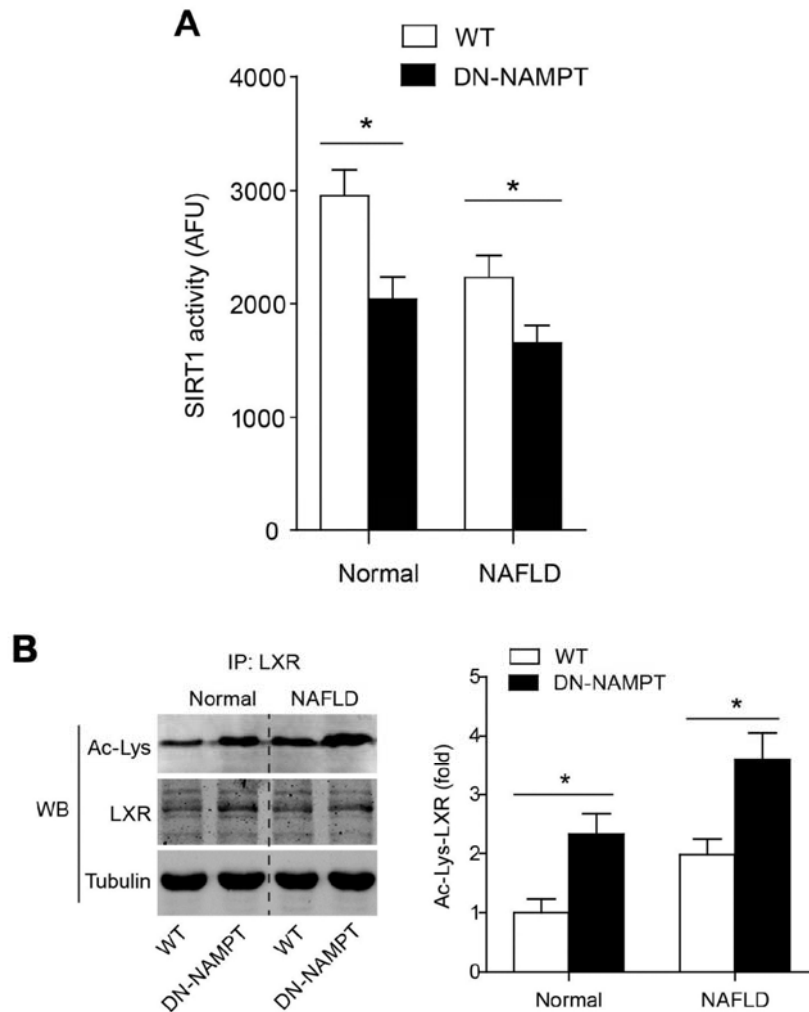

**SIRT1 activity in WT and DN-NAMPT mice under normal chow or HFD.** (A) SIRT1 activity in liver tissues of WT and DN-NAMPT mice under control and NAFLD conditions.  $*P < 0.05$  by Student's t-test.  $n = 8$  for each group. (B) Acetylation of LXR in liver tissues of WT and DN-NAMPT mice under control and NAFLD conditions.  $*P < 0.05$  by Student's t-test.  $n = 6$  for each group.

### Supplementary Figure 8

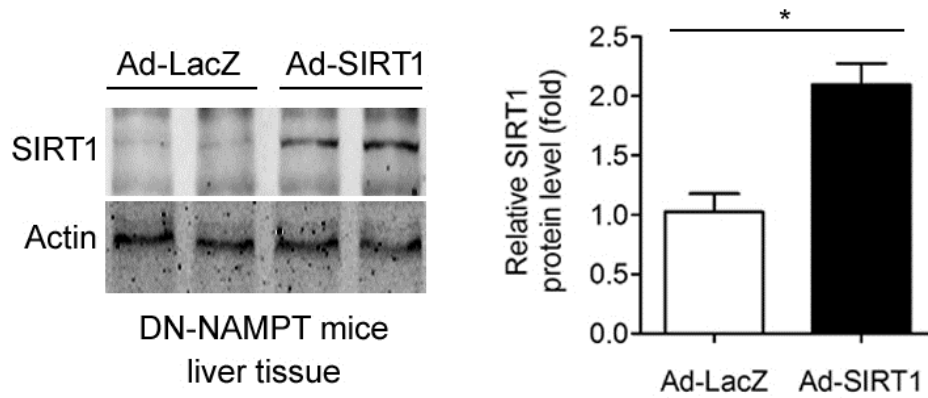

#### **Adenovirus-mediated SIRT1 overexpression in liver tissue of DN-NAMPT mice.**

Representative image and quantitative analysis of adenovirus-mediated SIRT1 overexpression in liver tissue of DN-NAMPT mice. \* $P < 0.05$  by Student's t-test.  $n = 4$  for each group.

### Supplementary Figure 9

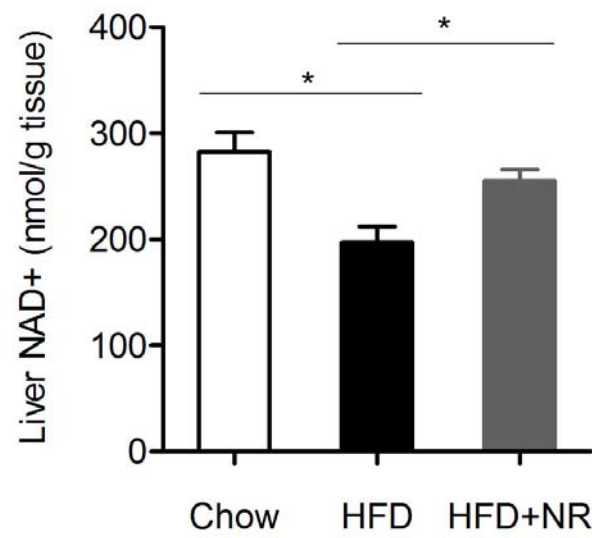

**NR treatment enhances hepatic NAD<sup>+</sup> level in HFD-fed mice.** \* $P < 0.05$  by Student's t-test. n = 6 for each group.

**Supplementary Table1****Clinical information for the patients with hepatectomy**

| Group              | Number | Age | Gender | Hepatectomy indication   | Hepatitis B virus infection |
|--------------------|--------|-----|--------|--------------------------|-----------------------------|
| <b>Age &lt; 45</b> | 1      | 43  | Male   | Hepatocellular carcinoma | +                           |
|                    | 2      | 29  | Male   | Hepatocellular carcinoma | +                           |
|                    | 3      | 36  | Female | Hepatocellular carcinoma | +                           |
|                    | 4      | 37  | Male   | Hepatocellular carcinoma | +                           |
|                    | 5      | 42  | Female | Hepatolithiasis          | –                           |
|                    | 6      | 45  | Male   | Hepatocellular carcinoma | +                           |
| <b>Age &gt; 60</b> | 7      | 62  | Male   | Hepatocellular carcinoma | +                           |
|                    | 8      | 63  | Female | Hepatocellular carcinoma | +                           |
|                    | 9      | 65  | Male   | Hepatolithiasis          | –                           |
|                    | 10     | 66  | Female | Hepatocellular carcinoma | +                           |
|                    | 11     | 67  | Male   | Hepatocellular carcinoma | +                           |
|                    | 12     | 71  | Female | Hepatolithiasis          | –                           |

**Supplementary Table2****Sequences of primers for PCR analysis**

| Gene                                | Forward Primer         | Reverse Primer          |
|-------------------------------------|------------------------|-------------------------|
| <i>ABCA1</i>                        | GCTGCAGGAATCCAGAGAAT   | CATGCACAAGGTCCTGAGAA    |
| <i>ABCG5</i>                        | AGGGCCTCACATCAACAGAG   | GCTGACGCTGTAGGACACAT    |
| <i>ABCG8</i>                        | TCCGAGGAGAACAAGCTGTC   | TCCGAGGAGAACAAGCTGTC    |
| <i>ABCG1</i>                        | CCGATGTGAACCCGTTTCT    | AGGCGGAGTCCTCTTCAGC     |
| <i>ApoB</i>                         | TTGGCAAACCTGCATAGCATCC | TCAAATTGGGACTCTCCTTTAGC |
| <i>MTTP</i>                         | GGAAGGCTTAATTGCAGCCA   | TTCAGCCTTGTCCATCTGCAT   |
| <i>CD36</i>                         | ATTAATGGCACAGACGCAGC   | CCGAACACAGCGTAGATAGACC  |
| <i>FABP1</i>                        | CAGAGCCAGGAGAACTTTCAG  | GATTTCTGACACCCCCTTGATG  |
| <i>LDL-R</i>                        | AGTGGCCCCGAATCATTGAC   | CTAACTAAACACCAGACAGAGGC |
| <i>SREBP-2</i>                      | GCAGCAACGGGACCATTCT    | CCCCATGACTAAGTCCTTCAACT |
| <i>HMGCR</i>                        | CATCATCCTGACGATAACGCG  | AGGCCAGCAATACCCAGAATG   |
| <i>PCSK9</i>                        | GAGACCCAGAGGCTACAGATT  | AATGTACTCCACATGGGGCAA   |
| <i><math>\alpha</math>-SMA</i>      | GTTCAGTGGTGCCTCTGTCA   | ACTGGGACGACATGGAAAAG    |
| <i>TIMP-1</i>                       | AGGTGGTCTCGTTGATTCGT   | GTAAGGCCTGTAGCTGTGCC    |
| <i>TGF<math>\beta</math>-1</i>      | TTGCCCTCTACAACCAACACAA | GGCTTGCGACCCACGTAGTA    |
| <i>Pro-Coll<math>\alpha</math>1</i> | GACATCCCTGAAGTCAGCTGC  | TCCCTTGGGTCCCTCGAC      |
| <i>GAPDH</i>                        | GTATGACTCCACTCACGGCAAA | GGTCTCGCTCCTGGAAGATG    |
